# Supplementary material for: A computational method for estimating the PCR duplication rate in DNA and RNA-seq experiments
Source: PubMed Central journal article supplement (PMC5374682; doi:10.1186/s12859-017-1471-9), 2017-03-14
Supplement: 12859_2017_1471_MOESM1_ESM.pdf [file 12859_2017_1471_MOESM1_ESM.pdf]

**Supplementary Data for “A computational method for estimating the PCR duplication rate in high-throughput DNA sequencing experiments”**

**Table S1: List of 40 samples from 1000 Genomes Project used for PCR duplication rate analysis (statistics from exome data)**

| Sample  | Population | # of reads used | Read duplication rate (PE) | PCR duplication rate (PE) | Read duplication rate (SE) |
|---------|------------|-----------------|----------------------------|---------------------------|----------------------------|
| HG00101 | GBR        | 52039587        | 0.0779                     | 0.074835                  | 0.2861                     |
| HG00105 | GBR        | 25077100        | 0.0462                     | 0.043821                  | 0.2243                     |
| HG00108 | GBR        | 59569448        | 0.0706                     | 0.067423                  | 0.3276                     |
| HG00109 | GBR        | 60005235        | 0.0607                     | 0.057193                  | 0.3159                     |
| HG00110 | GBR        | 58238727        | 0.058                      | 0.05482                   | 0.3145                     |
| HG00111 | GBR        | 44170975        | 0.0339                     | 0.030792                  | 0.2936                     |
| HG00121 | GBR        | 47499507        | 0.0311                     | 0.02873                   | 0.2577                     |
| HG00125 | GBR        | 43660871        | 0.0399                     | 0.037193                  | 0.276                      |
| HG00126 | GBR        | 28716880        | 0.0524                     | 0.050049                  | 0.2408                     |
| HG00149 | GBR        | 25935713        | 0.0543                     | 0.050944                  | 0.2365                     |
| HG00155 | GBR        | 65528854        | 0.183                      | 0.178348                  | 0.4296                     |
| HG00158 | GBR        | 82379994        | 0.1179                     | 0.115429                  | 0.2344                     |
| HG00179 | FIN        | 36590418        | 0.1531                     | 0.150348                  | 0.3331                     |
| HG00180 | FIN        | 24493629        | 0.0542                     | 0.051157                  | 0.2283                     |
| HG00182 | FIN        | 54552252        | 0.0865                     | 0.083623                  | 0.2793                     |
| HG00185 | FIN        | 48889024        | 0.0637                     | 0.060982                  | 0.2618                     |
| HG00187 | FIN        | 47981811        | 0.0954                     | 0.092898                  | 0.2668                     |
| HG00188 | FIN        | 49518818        | 0.0598                     | 0.05644                   | 0.2607                     |
| HG00189 | FIN        | 48354999        | 0.0837                     | 0.081279                  | 0.245                      |
| HG00235 | GBR        | 21942866        | 0.0516                     | 0.048938                  | 0.2188                     |
| HG00250 | GBR        | 42042019        | 0.0335                     | 0.031016                  | 0.2458                     |
| HG00252 | GBR        | 56342582        | 0.0439                     | 0.04052                   | 0.3189                     |
| HG00278 | FIN        | 46343370        | 0.0344                     | 0.031                     | 0.3052                     |
| HG00280 | FIN        | 54269819        | 0.0331                     | 0.030494                  | 0.2931                     |
| HG00281 | FIN        | 45460431        | 0.0329                     | 0.030283                  | 0.2771                     |
| HG00284 | FIN        | 47121877        | 0.0376                     | 0.034822                  | 0.2858                     |
| HG00306 | FIN        | 22611363        | 0.0804                     | 0.077717                  | 0.2722                     |
| HG00320 | FIN        | 47497988        | 0.0391                     | 0.036132                  | 0.2674                     |
| HG00323 | FIN        | 46018786        | 0.0367                     | 0.033742                  | 0.2607                     |
| HG00324 | FIN        | 42813717        | 0.0293                     | 0.026942                  | 0.2699                     |
| HG00326 | FIN        | 52087485        | 0.0369                     | 0.033908                  | 0.2924                     |
| HG00330 | FIN        | 47031842        | 0.0295                     | 0.026379                  | 0.2762                     |
| HG00336 | FIN        | 46325052        | 0.0293                     | 0.026685                  | 0.2579                     |
| HG00342 | FIN        | 43439553        | 0.0347                     | 0.032149                  | 0.2531                     |
| HG00343 | FIN        | 40318522        | 0.0265                     | 0.02412                   | 0.2425                     |
| HG00345 | FIN        | 45724053        | 0.0363                     | 0.033868                  | 0.2805                     |
| HG00353 | FIN        | 43923597        | 0.0357                     | 0.032749                  | 0.2916                     |
| HG00371 | FIN        | 32991155        | 0.0999                     | 0.09636                   | 0.3337                     |
| HG00383 | FIN        | 43665814        | 0.0282                     | 0.025679                  | 0.2332                     |
| HG02215 | GBR        | 58194492        | 0.088                      | 0.083882                  | 0.3777                     |

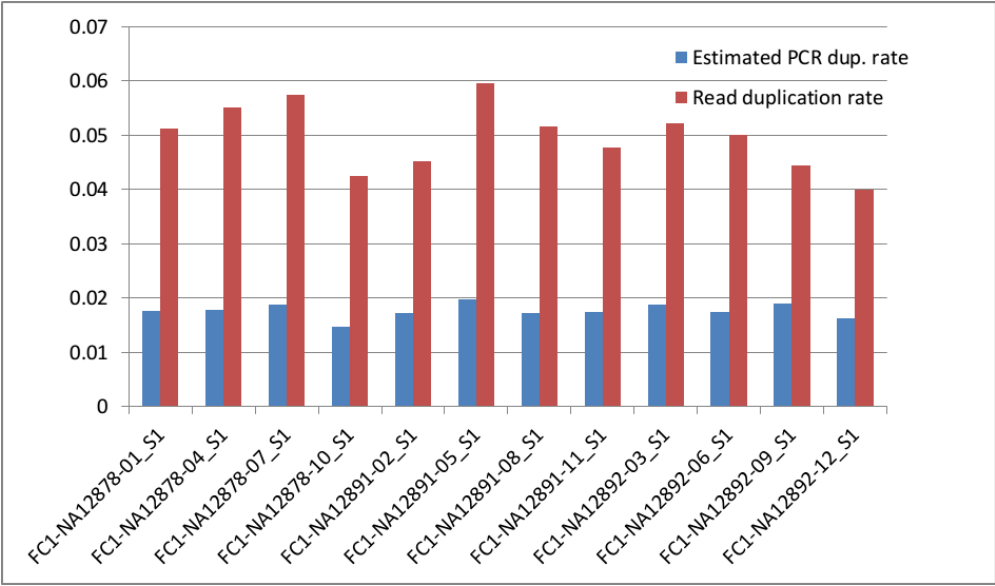

**Figure S2:** Read duplicate and PCR duplication rate estimates for the Illumina Nextera exome datasets

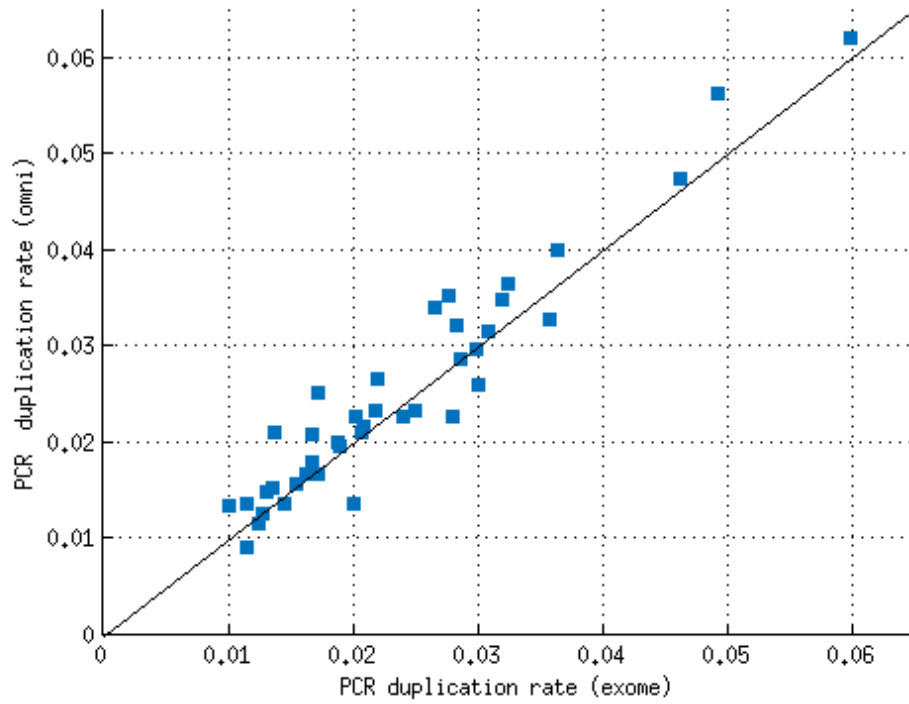

**Figure S3:** Concordance between the PCR duplication rate estimates for the 40 RNA-seq samples using two sets of variant calls derived from exome sequencing and Omni genotyping
